# Supplementary material
Source: PubMed Central journal article supplement (PMC4737675)
Supplement: ijbsv12p0184s1.pdf [file ijbsv12p0184s1.pdf]

## Supplemental Figure Legends

**Fig. S1. Expression of amyloidogenic lysozymes in the *Pichia pastoris* expression system.** A: RT-PCR. B: Lysozyme in the medium by western blot with anti-hLz.

Numbers indicate the culture lot. C: Lysozyme in whole cells by western blot with anti-hLz. hLz, human lysozyme.

**A**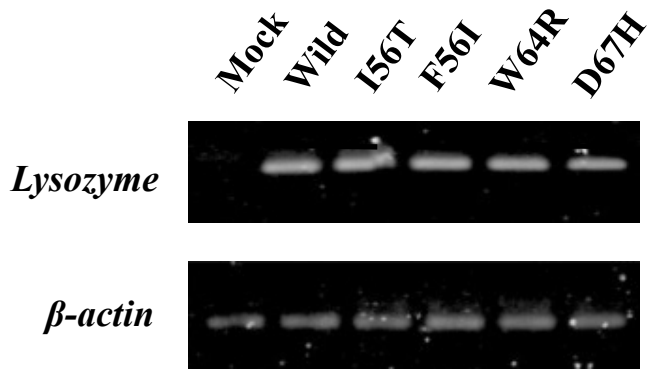**B**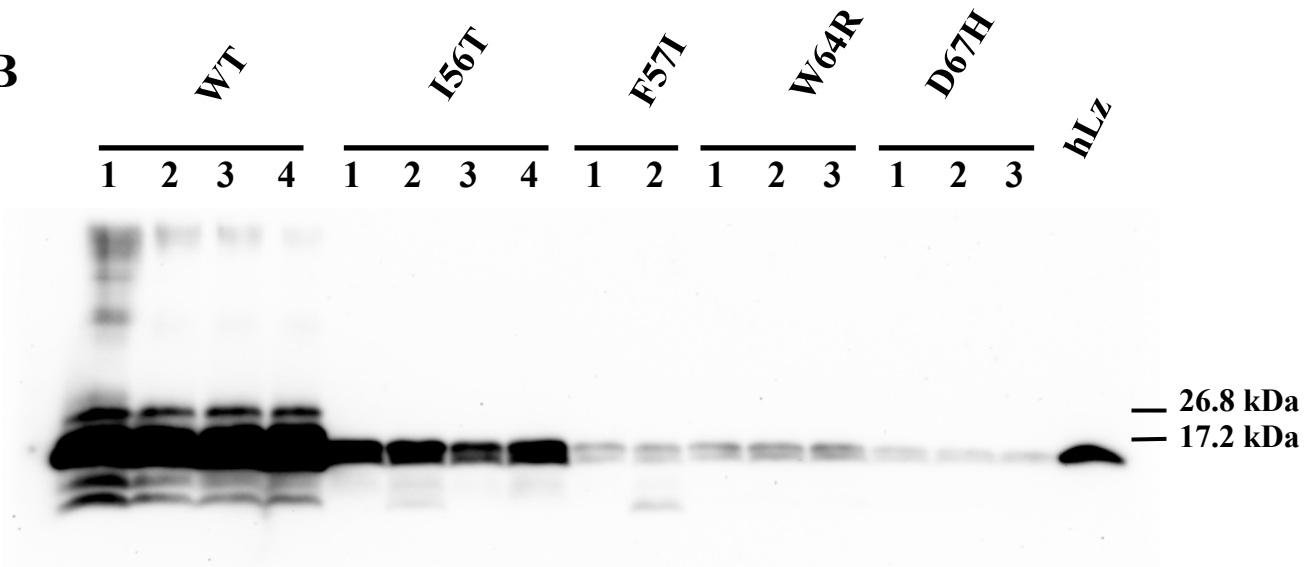**C**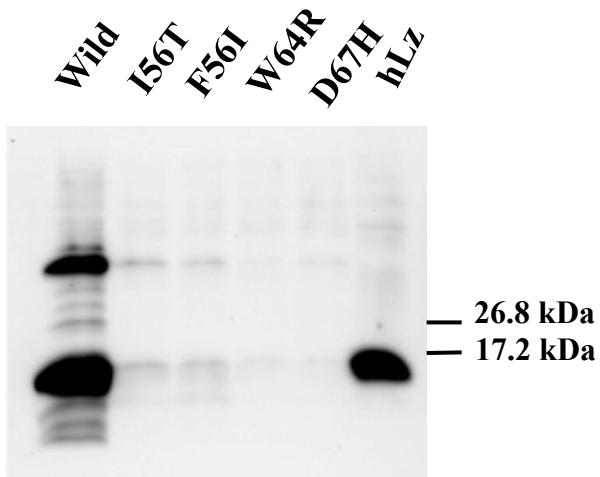**Fig. S1**
